# Supplementary material
Source: Springer Nature journal article supplement (https://www.springerprofessional.de/resource/supplementary/13688_2013_19_MOESM1_ESM.pdf/11893956)
Supplement: MOESM1 [file 11893956]

**Table S1 | R<sup>2</sup> values by field.** The pairs showing negative correlations are shaded.

| <b>Biology</b>   |         |                      |        |                    |           |        |               |               |
|------------------|---------|----------------------|--------|--------------------|-----------|--------|---------------|---------------|
| Scopus/Wikipedia | Editors | Editors without bots | Edits  | Edits without bots | In-degree | Length | Languages     | Views in 2012 |
| N Documents      | 0.0000  | 0.0024               | 0.0009 | 0.0037             | 0.0111    | 0.0042 | 0.0061        | 0.0064        |
| N citations      | 0.0011  | 0.0041               | 0.0089 | 0.0136             | 0.0182    | 0.0079 | 0.0128        | 0.0083        |
| Mean citations   | 0.0016  | 0.0018               | 0.0167 | 0.0177             | 0.0133    | 0.0067 | 0.0131        | 0.0071        |
| h-index          | 0.0001  | 0.0017               | 0.0005 | 0.0016             | 0.0146    | 0.0096 | 0.0041        | 0.0069        |
| N co-authors     | 0.0312  | 0.0412               | 0.0340 | 0.0379             | 0.0556    | 0.0343 | 0.0078        | 0.0155        |
| Years active     | 0.0133  | 0.0271               | 0.0170 | 0.0263             | 0.0001    | 0.0016 | <b>0.0189</b> | 0.0072        |

  

| <b>Computer Science</b> |         |                      |        |                    |               |        |           |               |
|-------------------------|---------|----------------------|--------|--------------------|---------------|--------|-----------|---------------|
| Scopus/Wikipedia        | Editors | Editors without bots | Edits  | Edits without bots | In-degree     | Length | Languages | Views in 2012 |
| N Documents             | 0.0080  | 0.0091               | 0.0125 | 0.0108             | 0.0007        | 0.0073 | 0.0137    | 0.0052        |
| N citations             | 0.0046  | 0.0053               | 0.0051 | 0.0040             | 0.0124        | 0.0165 | 0.0014    | 0.0005        |
| Mean citations          | 0.0001  | 0.0002               | 0.0001 | 0.0002             | <b>0.0226</b> | 0.0155 | 0.0060    | 0.0151        |
| h-index                 | 0.0060  | 0.0053               | 0.0070 | 0.0041             | 0.0002        | 0.0073 | 0.0276    | 0.0057        |
| N co-authors            | 0.0056  | 0.0052               | 0.0071 | 0.0055             | 0.0000        | 0.0002 | 0.0151    | 0.0108        |
| Years active            | 0.0052  | 0.0085               | 0.0199 | 0.0254             | 0.0173        | 0.0402 | 0.0031    | 0.0007        |

  

| <b>Physics</b>   |         |                      |        |                    |           |        |               |               |
|------------------|---------|----------------------|--------|--------------------|-----------|--------|---------------|---------------|
| Scopus/Wikipedia | Editors | Editors without bots | Edits  | Edits without bots | In-degree | Length | Languages     | Views in 2012 |
| N Documents      | 0.0015  | 0.0010               | 0.0080 | 0.0067             | 0.0005    | 0.0109 | 0.0054        | 0.0002        |
| N citations      | 0.0228  | 0.0155               | 0.0125 | 0.0083             | 0.0005    | 0.0075 | 0.0039        | 0.0199        |
| Mean citations   | 0.0227  | 0.0169               | 0.0035 | 0.0018             | 0.0035    | 0.0030 | <b>0.0351</b> | 0.0182        |
| h-index          | 0.0016  | 0.0010               | 0.0001 | 0.0000             | 0.0146    | 0.0224 | 0.0039        | 0.0006        |
| N co-authors     | 0.0087  | 0.0119               | 0.0014 | 0.0022             | 0.0010    | 0.0410 | 0.0008        | 0.0073        |
| Years active     | 0.0187  | 0.0132               | 0.0264 | 0.0190             | 0.0095    | 0.0003 | 0.0134        | 0.0122        |

  

| <b>Psychology &amp; Psychiatry</b> |         |                      |        |                    |               |        |           |               |
|------------------------------------|---------|----------------------|--------|--------------------|---------------|--------|-----------|---------------|
| Scopus/Wikipedia                   | Editors | Editors without bots | Edits  | Edits without bots | In-degree     | Length | Languages | Views in 2012 |
| N Documents                        | 0.0089  | 0.0085               | 0.0111 | 0.0109             | 0.0549        | 0.0149 | 0.0042    | 0.0427        |
| N citations                        | 0.0174  | 0.0172               | 0.0147 | 0.0140             | 0.0801        | 0.0070 | 0.0073    | 0.0654        |
| Mean citations                     | 0.0223  | 0.0231               | 0.0141 | 0.0131             | 0.0709        | 0.0011 | 0.0050    | 0.0646        |
| h-index                            | 0.0036  | 0.0035               | 0.0023 | 0.0021             | 0.0228        | 0.0021 | 0.0002    | 0.0364        |
| N co-authors                       | 0.0024  | 0.0029               | 0.0062 | 0.0072             | 0.0135        | 0.0158 | 0.0023    | 0.0067        |
| Years active                       | 0.0117  | 0.0114               | 0.0006 | 0.0003             | <b>0.1292</b> | 0.0119 | 0.0173    | 0.1180        |
